# Supplementary material for: A γ-ray and dual redox-responsive supramolecular polymer constructed by a selenium containing pillar[5]arene dimer and a neutral guest
Source: Royal Society of Chemistry journal article supplement (doi:10.1039/c5cc02886h), 2015-01-01
Supplement: c5cc02886h1.pdf [file c5cc02886h1.pdf]

# **A $\gamma$ -ray and dual redox-responsive supramolecular polymer constructed by a selenium containing pillar[5]arene dimer and a neutral guest**

Yujuan Zhou, Kecheng Jie, Bingbing Shi, Yong Yao\*

*Department of Chemistry, Zhejiang University, Hangzhou 310027, P. R. China; Fax and Tel: +86-571-8795-3189;*

*Email address: yaoyong@zju.edu.cn.*

## **Electronic Supplementary Information (12 pages)**

|                                                                                                     |     |
|-----------------------------------------------------------------------------------------------------|-----|
| 1. <i>Materials and methods</i>                                                                     | S2  |
| 2. <i>Synthesis of pillar[5]arene dimer 1</i>                                                       | S3  |
| 3. <i>Synthesis of neutral guest 2</i>                                                              | S6  |
| 4. <i>Determination of diffusion coefficient D</i>                                                  | S10 |
| 5. <i>SEM images of supramolecular polymer after addition of H<sub>2</sub>O<sub>2</sub> and GSH</i> | S10 |
| 6. <i>Partial <sup>1</sup>H NMR spectra of 1 and 2 after using <math>\gamma</math>-radiation</i>    | S11 |
| 7. <i>Reaction mechanism of diselenide group after adding H<sub>2</sub>O<sub>2</sub> or GSH</i>     | S11 |
| 8. <i>References</i>                                                                                | S12 |

## *1. Materials and methods*

All reagents were commercially available and used as supplied without further purification. Solvents were either employed as purchased or dried according to procedures described in the literature. Copillar[5]arene,<sup>S1</sup> Na<sub>2</sub>Se<sub>2</sub><sup>S2</sup> and **G**<sup>S3</sup> were prepared according to a published procedure. <sup>1</sup>H NMR, <sup>77</sup>Se NMR and <sup>13</sup>C NMR spectra were recorded with a Bruker Avance DMX 400 spectrophotometer or Bruker Avance DMX 500 or Bruker Avance DMX 600 using the deuterated solvent as the lock and the residual solvent or TMS as the internal reference. Low-resolution electrospray ionization mass spectra were recorded with a Bruker Esquire 3000 Plus spectrometer. High-resolution mass spectrometry experiments were performed with IonSpec 4.7 Tesla FTMS. Viscosity measurements were carried out with a Cannon-Ubbelohde semi-micro dilution viscomeer at 298K in water. Scanning electron microscopy investigations were carried out on a JEOL 6390LV instrument.

## 2. Synthesis of pillar[5]arene dimer **1**

**Scheme S1.** Synthetic route to pillar[5]arene dimer **1**.

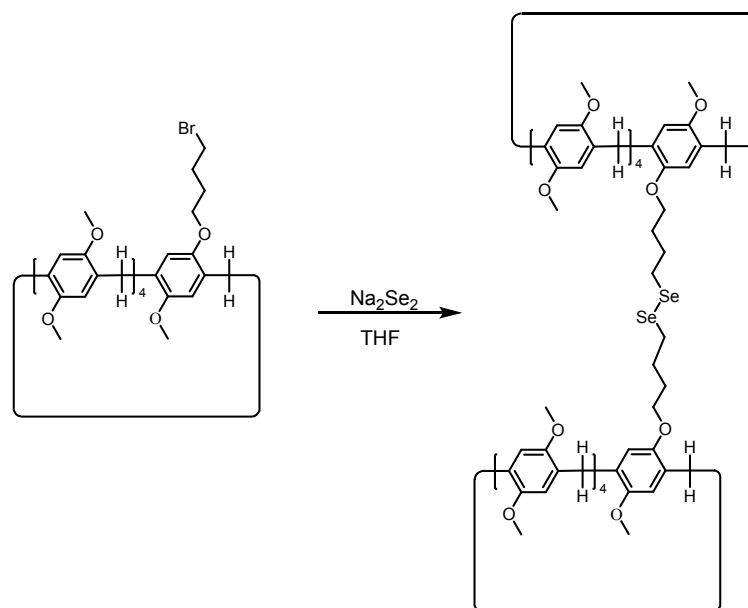

Copillar[5]arene was synthesized according to previous literature.<sup>S1</sup> NaSeSeNa (1.5 mmol, 3ml) solution was added with magnetic stirring to copillar[5]arene (0.73 g, 0.9 mmol) THF solution with N<sub>2</sub> protection. The mixture was stirred for 24 h at 50 °C. Then the solvent was removed and the combined mixture was further purified by silica gel column chromatography eluting with 1:1 dichloromethane: petroleum ether. The evaporation of the solvent gave the yellow powder (0.71 g, 90%). The <sup>1</sup>H NMR spectrum of **1** is shown in Fig. S1. <sup>1</sup>H NMR (400 MHz, chloroform-*d*, 293 K)  $\delta$  (ppm): 6.8–6.72 (m, 10 H), 3.8–3.77 (m, 12 H), 3.66–3.58 (m, 27 H), 2.87 (s, 2H), 1.78 (s, 4H). The <sup>77</sup>Se NMR spectrum of **1** is shown in Fig. S2. <sup>77</sup>Se NMR (600 MHz, chloroform-*d*, 293 K)  $\delta$  (ppm): 304.71. The <sup>13</sup>C NMR spectrum of **1** is shown in Fig. S3. <sup>13</sup>C NMR (100 MHz, chloroform-*d*, 293 K)  $\delta$  (ppm): 150.85, 150.78, 149.76, 128.26, 114.78, 114.14, 67.38, 55.85, 55.79, 55.69, 53.38, 31.54, 29.68, 22.43, 14.13. LRESIMS is shown in Fig. S4: *m/z* 1760.1 [**1** + NH<sub>4</sub>]<sup>+</sup>. HRESIMS is shown in Fig. S5: *m/z* calcd for [**1** + NH<sub>4</sub>]<sup>+</sup> C<sub>96</sub>H<sub>114</sub>O<sub>20</sub>Se<sub>2</sub>N<sup>+</sup>, 1760.6330; found 1760.5959; error 21 ppm.

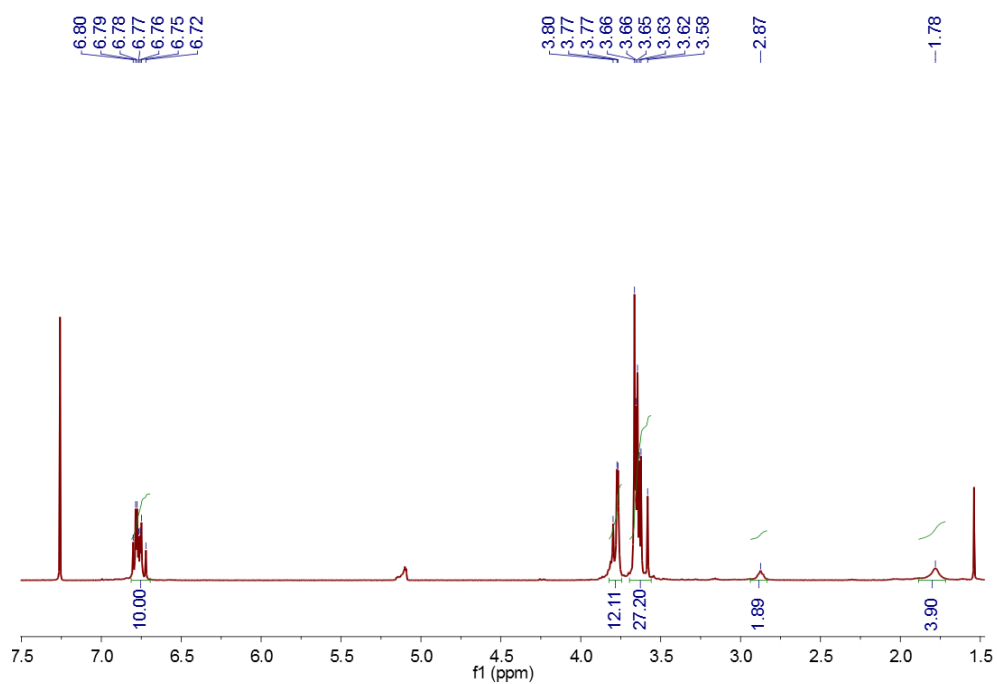

**Fig. S1**  $^1\text{H}$  NMR spectrum (400 MHz, chloroform-*d*, 293K) of pillar[5]arene dimer **1**.

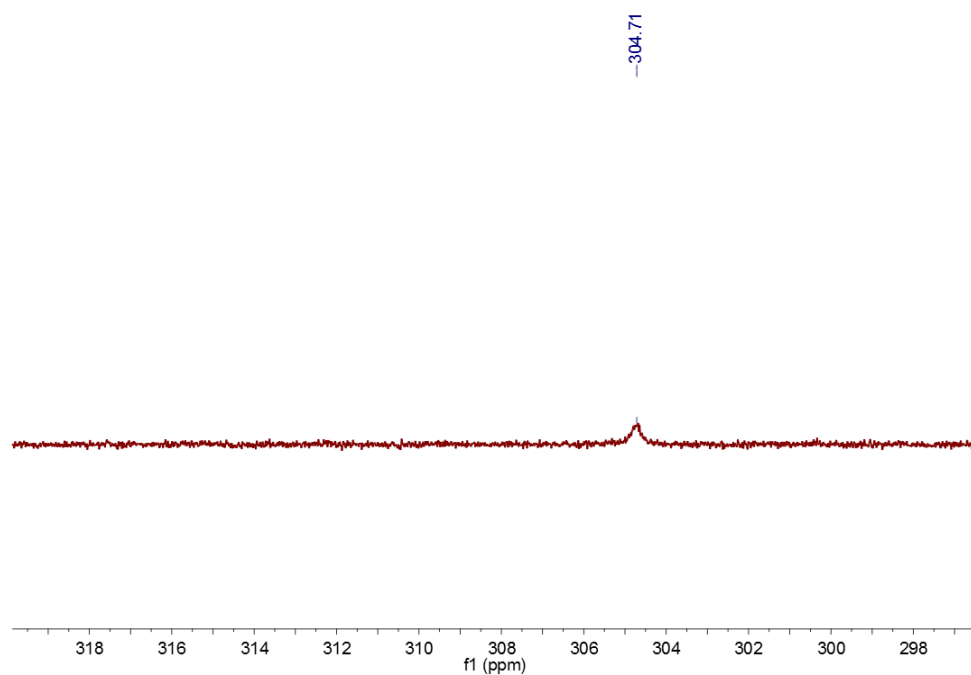

**Fig. S2**  $^{77}\text{Se}$  NMR spectrum (600 MHz, chloroform-*d*, 293K) of pillar[5]arene dimer **1**.

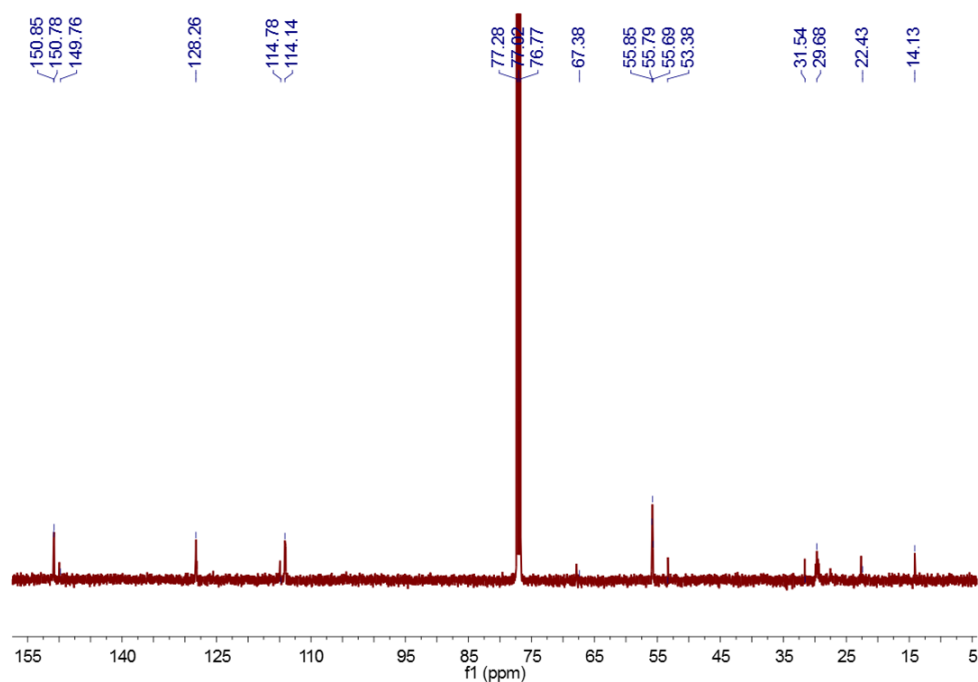

**Fig. S3**  $^{13}\text{C}$  NMR spectrum (100 MHz, chloroform-*d*, 293K) of pillar[5]arene dimer **1**.

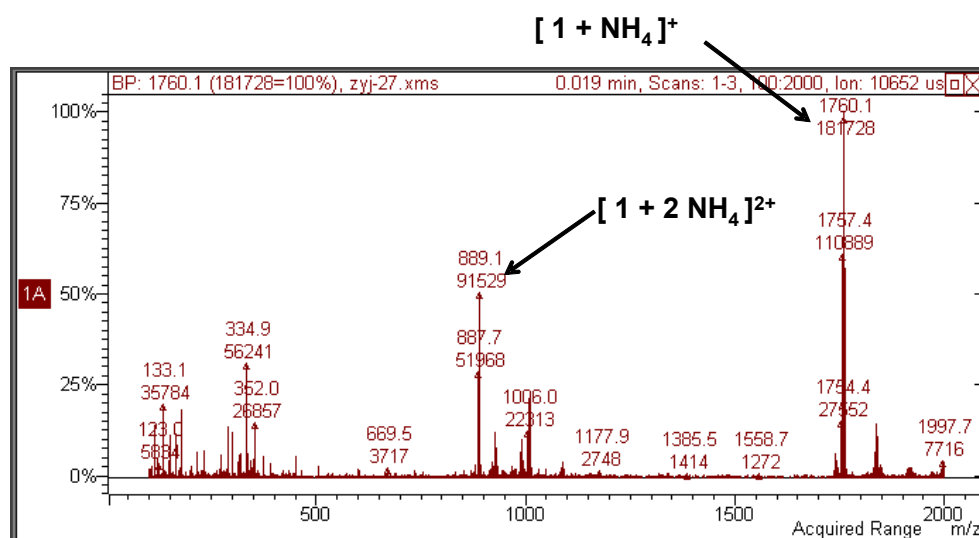

**Fig. S4** Electrospray ionization mass spectra of pillar[5]arene dimer **1**. Assignment of the main peak:  $m/z$  1760.1 [**1** +  $\text{NH}_4$ ] $^+$ .

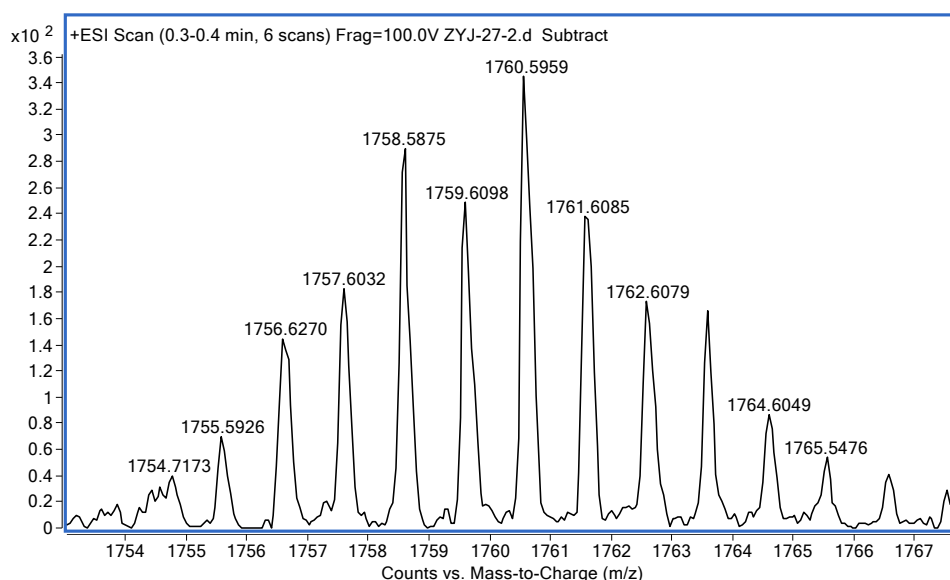

**Fig. S5** High resolution electrospray ionization mass spectra of pillar[5]arene dimer **1**.

### 3. Synthesis of neutral guest **2**

**Scheme S2.** Synthetic route to **2**.

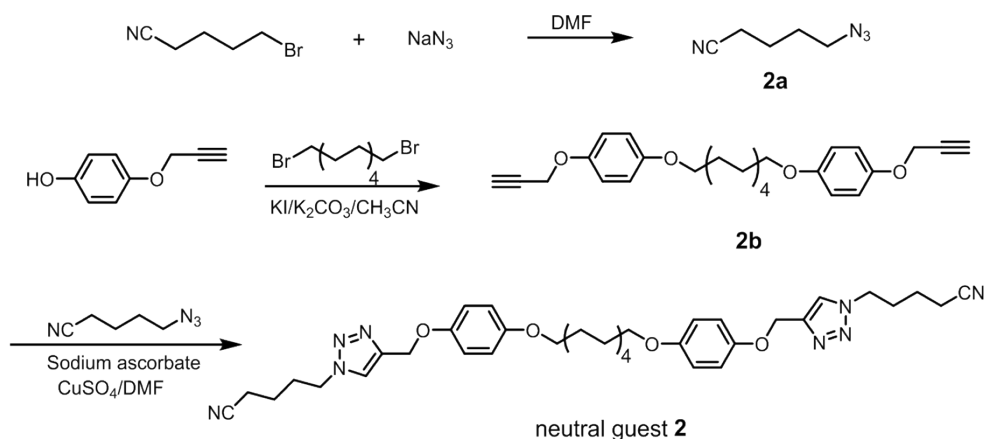

5-Azidepentanenitrile **2a** was prepared according to previous literature.<sup>S3</sup> Sodium azide (0.95 g, 15 mmol) was added to a solution of 5-bromopentanenitrile (2.0 g, 12 mmol) in dry *N,N*-dimethylformamide (30 mL). The reaction mixture was stirred at 80 °C for 10 h. After completion, the cooled reaction mixture was added to diethyl ether (100 mL). The solution was washed with H<sub>2</sub>O (2 × 100 mL) and brine (2 × 50 mL), and dried over anhydrous Na<sub>2</sub>SO<sub>4</sub>. The organic layer was removed under vacuum to give **2a** (1.8 g, 92 %) as an oil. <sup>1</sup>H NMR spectrum of **2a** is shown in Fig. S6. <sup>1</sup>H NMR (400 MHz, CDCl<sub>3</sub>, 298K) δ (ppm): 1.75 (t, *J* = 4 Hz, 4H), 2.41 (t, *J* = 12 Hz, 2H), 3.37 (t, *J* = 12 Hz, 2H).

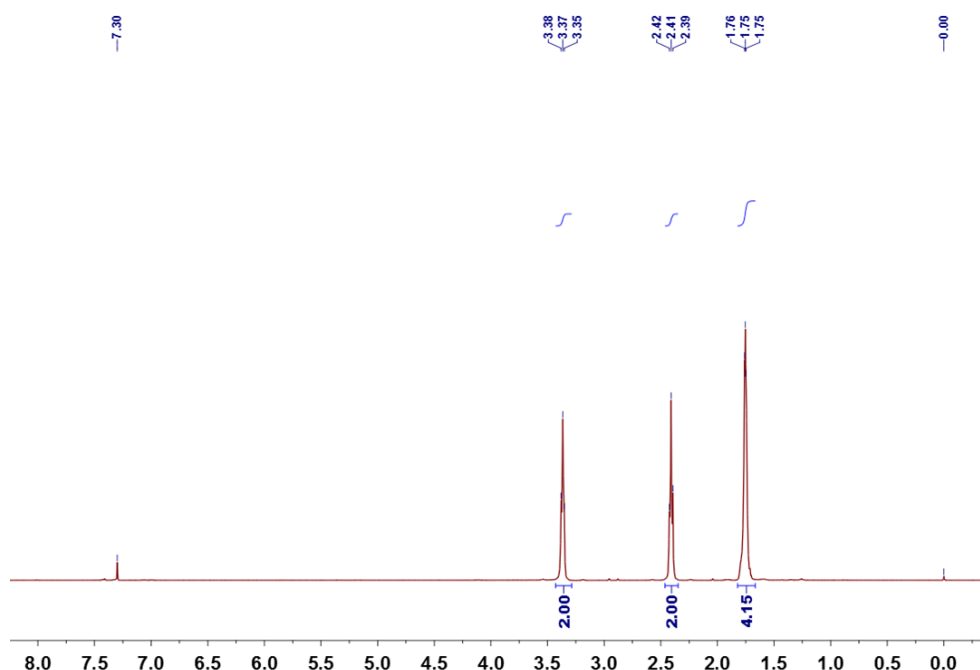

**Fig. S6**  $^1\text{H}$  NMR spectrum (400 MHz, chloroform-*d*, 298K) of **2a**.

In a 500 mL round bottom flask, methoxy-4-(prop-2-ynyloxy)benzene (8.88 g, 60.0 mmol),  $\text{K}_2\text{CO}_3$  (33.1 g, 240 mmol), KI (0.830 g, 5.00 mmol), 1,10-dibromodecane (54.0 g, 180.0 mmol) and acetonitrile (300 mL) were added. The reaction mixture was stirred at reflux for 48 hours. After the solid was filtered off, the solvent was removed. The solid was dissolved in  $\text{CHCl}_3$  (200 mL) and washed twice with  $\text{H}_2\text{O}$  (200 mL). The organic layer was dried over anhydrous  $\text{Na}_2\text{SO}_4$  and evaporated to afford the crude product, which was recrystallized with  $\text{CH}_3\text{CN}$  to give the intermediate **2b** as a white solid (22.6 g, 86 %) as a white solid. The proton NMR spectrum of **2b** is shown in Fig. S7.  $^1\text{H}$  NMR (400 MHz,  $\text{CDCl}_3$ , 298K)  $\delta$  (ppm): 6.92 (d,  $J = 8$  Hz, 4H), 6.84 (d,  $J = 8$  Hz, 4H), 4.63 (s, 4H), 3.90 (t,  $J = 12$  Hz, 4H), 2.50 (t,  $J = 8$  Hz, 2H), 1.77–1.73 (m, 4H), 1.45–1.42 (m, 4H), 1.32 (m, 8H). The  $^{13}\text{C}$  NMR spectrum of **2b** is shown in Fig. S8. The  $^{13}\text{C}$  NMR (100 MHz,  $\text{CDCl}_3$ , 298K)  $\delta$  (ppm): 154.05, 151.56, 116.10, 115.32, 78.96, 75.30, 68.54, 56.62, 29.51, 29.40, 29.37, 26.06.

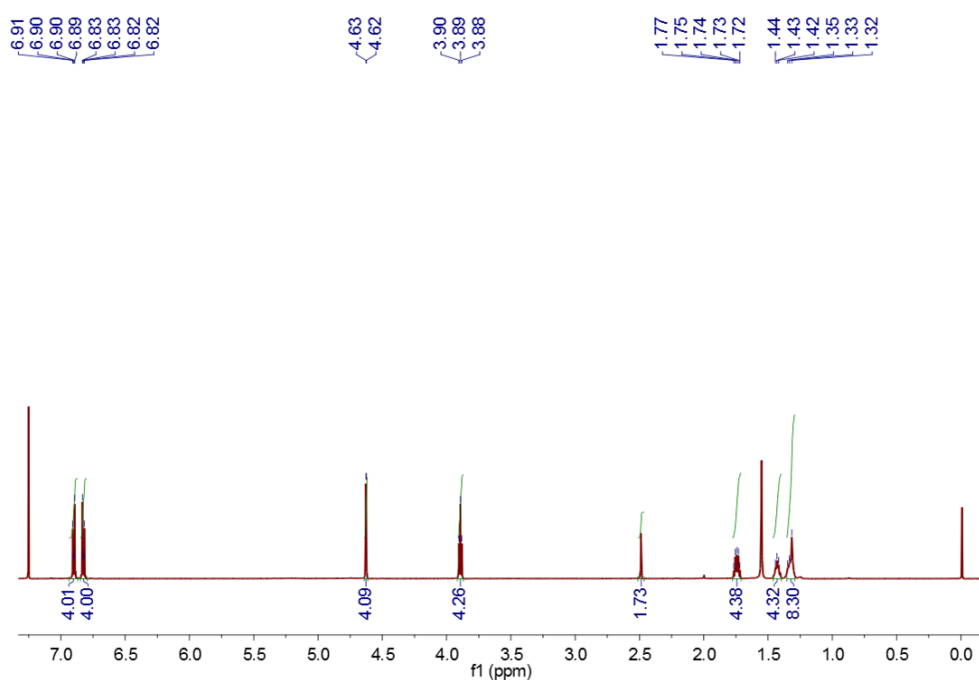

**Fig. S7**  $^1\text{H}$  NMR spectrum (400 MHz, chloroform-*d*, 298K) of **2b**.

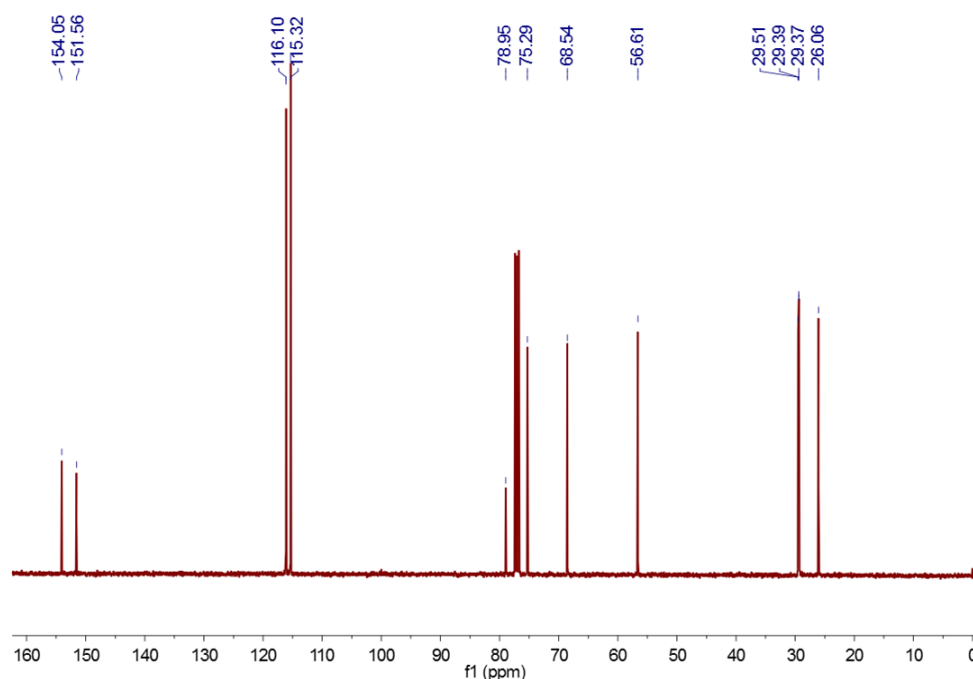

**Fig. S8**  $^{13}\text{C}$  NMR spectrum (100 MHz, chloroform-*d*, 293K) of **2b**.

Copper sulfate pentahydrate [ $\text{CuSO}_4 \cdot 5\text{H}_2\text{O}$ , 0.68 g, 2.8 mmol] was added to a solution of **2a** (1.34 g, 10.8 mmol) and **2b** (1.89 g, 5.4 mmol) in DMF (30 mL). Sodium ascorbate (1.0 g, 5.4 mmol) was then added and the solution was stirred at 90 °C for 12 h. The reaction mixture was poured into brine (200 mL) and extracted with  $\text{CH}_2\text{Cl}_2$  (2  $\times$  100 mL). The organic layer was dried over anhydrous  $\text{Na}_2\text{SO}_4$  and concentrated under vacuum. The residue was purified by silica gel chromatography (eluent: petroleum ether/ethyl acetate 1 : 10) to afford product **2** (2.9 g, 90 %) as a white solid. The



proton NMR spectrum of **2** is shown in Fig. S9.  $^1\text{H}$  NMR (400 MHz,  $\text{CDCl}_3$ , 298K)  $\delta$  (ppm): 7.60 (s, 2H), 6.92 (d,  $J = 8$  Hz, 4H), 8.84 (d,  $J = 8$  Hz, 4H), 5.16 (s, 4H), 4.43 (t,  $J = 12$  Hz, 4H), 3.90 (t,  $J = 8$  Hz, 4H), 2.41 (t,  $J = 8$  Hz, 4H), 2.11–2.08 (m, 4H), 1.77–1.63 (m, 9H), 1.45–1.32 (m, 14H). The  $^{13}\text{C}$  NMR spectrum of **2** is shown in Fig. S10. The  $^{13}\text{C}$  NMR (100 MHz,  $\text{CDCl}_3$ , 298K)  $\delta$  (ppm): 153.79, 152.16, 144.89, 122.53, 118.91, 115.81, 115.41, 68.57, 62.73, 49.24, 29.47, 29.36, 29.05, 26.04, 22.32, 16.71.

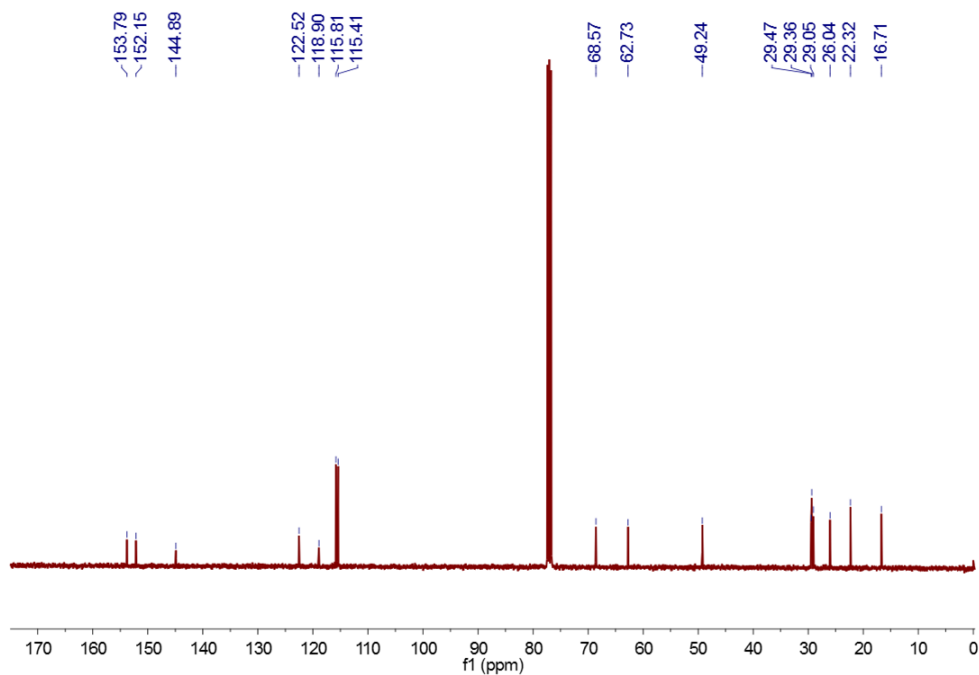

**Fig. S9**  $^1\text{H}$  NMR spectrum (400 MHz, chloroform- $d$ , 298K) of **2**.

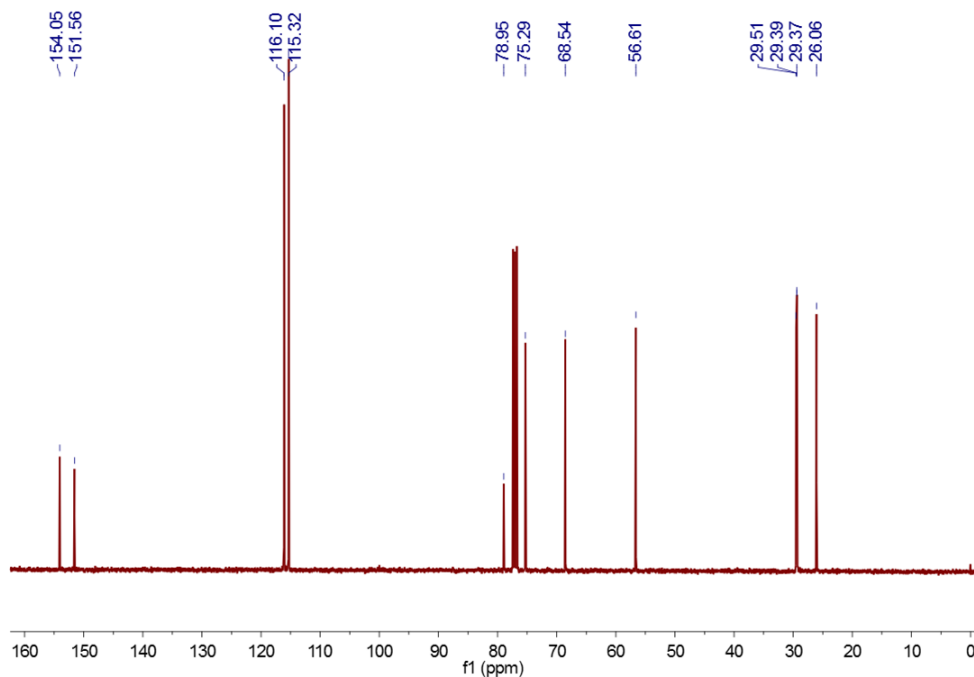

**Fig. S10**  $^{13}\text{C}$  NMR spectrum (100 MHz, chloroform- $d$ , 293K) of **2**.

#### 4. Determination of diffusion coefficient $D$

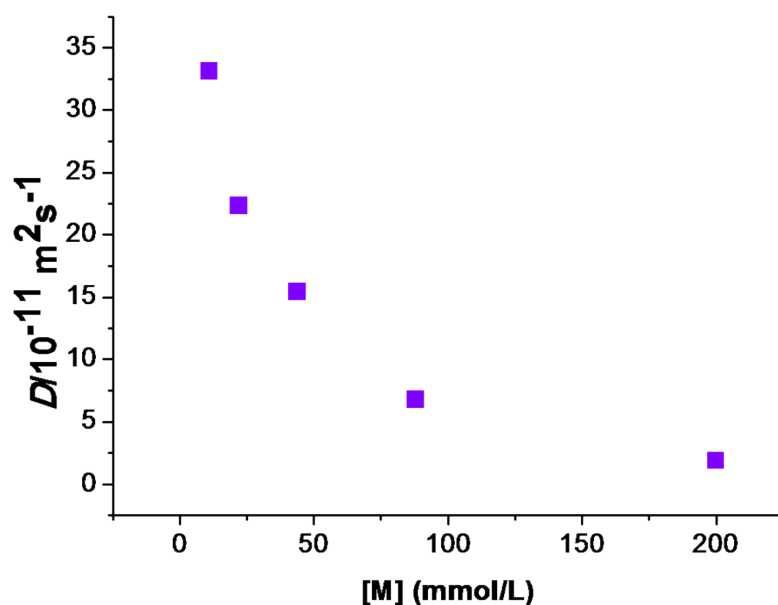

**Fig. S11** Concentration dependence of diffusion coefficient  $D$  (500 MHz,  $\text{CDCl}_3$ , 298K).

As the monomer concentration increased from 11.0 mM to 200 mM in solution, the measured weighted average diffusion coefficient decreased considerably from  $3.31 \times 10^{-10} \text{ m}^2 \text{ s}^{-1}$  to  $1.86 \times 10^{-11} \text{ m}^2 \text{ s}^{-1}$ , indicating the concentration dependence of supramolecular polymerization and the formation of a high weight polymer structure.

#### 5. SEM images of supramolecular polymer after addition of $\text{H}_2\text{O}_2$ and GSH

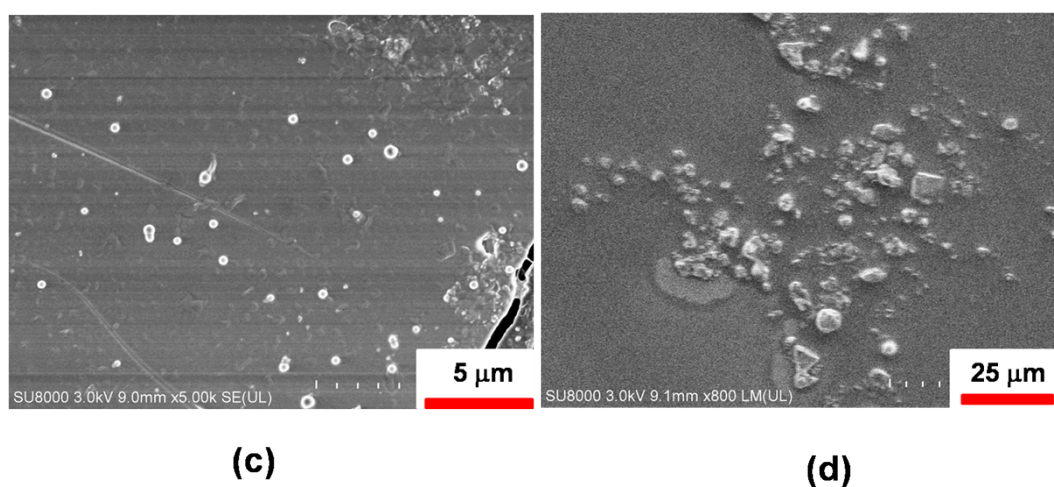

**Fig. S12** SEM images of (c) the linear supramolecular polymer after addition of  $\text{H}_2\text{O}_2$  and (d) the linear supramolecular polymer after addition of GSH.

6. Partial  $^1\text{H}$  NMR spectra of **1** and **2** after using  $\gamma$ -radiation

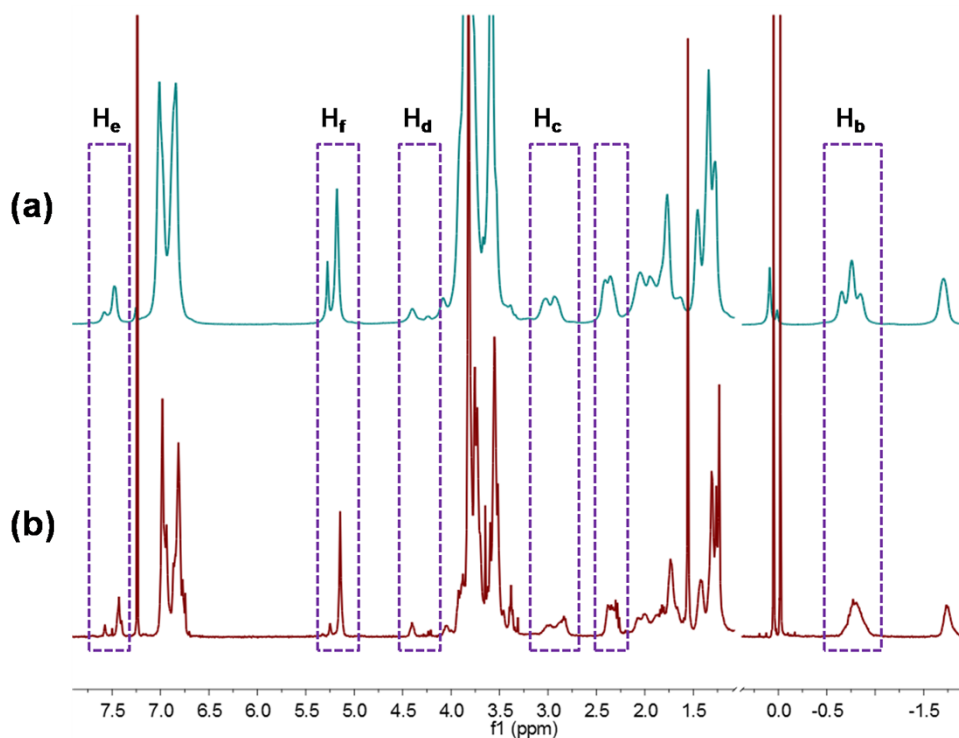

**Fig. S13** (a)  $^1\text{H}$  NMR spectra (500 MHz, 298 K) of **1** and **2** in  $\text{CDCl}_3$  at 88.0 mM. (b) after using  $\gamma$ -radiation at 50 Gy for 1 hour.

7. Reaction mechanism of diselenide group after adding  $\text{H}_2\text{O}_2$  or GSH

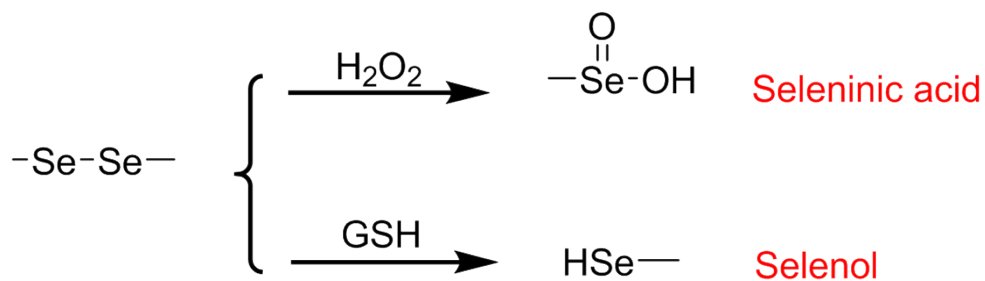

**Fig. S14** Chemdraw structures of reaction mechanism of diselenide group after adding  $\text{H}_2\text{O}_2$  or GSH.

*References:*

- S1. J. Yang, Z. Li, Y. Zhou and G. Yu, *Ploym. Chem.*, 2014, **5**, 6645.
- S2. (a) D. L. Klayman and T. S. Griffin, *J. Am. Chem. Soc.*, 1973, 197; (b) X. Zhang, H. Xu, Z. Dong, Y. Wang, J. Liu and J. Shen, *J. Am. Chem. Soc.*, 2004, **126**, 10556.
- S3. C. Li, K. Han, J. Li, Y. Zhang, W. Chen, Y. Yu and X. Jia, *Chem. Eur. J.*, 2013, **19**, 11892.
